# Supplementary material
Source: ML conference proceedings conference paper supplement (https://www.ecva.net/papers/eccv_2020/papers_ECCV/html/123470256_ECCV_2020_paper.php)
Supplement: Supplementary file 2 [file 123470256-supp.zip]

Archive with 5 entries (4 files):
- 3265_supp/
- 3265_supp/image_restoration.mp4
- 3265_supp/image_manipulation.mp4
- 3265_supp/3265_supp.pdf
- 3265_supp/image_morphing.mp4
